# Supplementary material for: Effects of V2O5 nanowires on the performances of Li2MnSiO4 as a cathode material for lithium-ion batteries
Source: Royal Society of Chemistry journal article supplement (doi:10.1039/c5ra07757e), 2015-01-01
Supplement: c5ra07757e1.pdf [file c5ra07757e1.pdf]

Effects of V<sub>2</sub>O<sub>5</sub> Nanowires on the Performances of Li<sub>2</sub>MnSiO<sub>4</sub> as Cathode Material  
for Lithium-ion Batteries

Hai Zhu<sup>a</sup>, Xiaoling Ma<sup>b\*</sup>, Ling Zan<sup>a</sup>, Youxiang Zhang<sup>a\*</sup>

a College of Chemistry and Molecular Sciences, Wuhan University, Wuhan 430072,  
P. R. China;

b College of Chemistry and Life Science, Hubei University of Education, Wuhan,  
430205, China.

\* Corresponding author. Email: [yxzhang04@whu.edu.cn](mailto:yxzhang04@whu.edu.cn); [maxiaoling@hue.edu.cn](mailto:maxiaoling@hue.edu.cn)

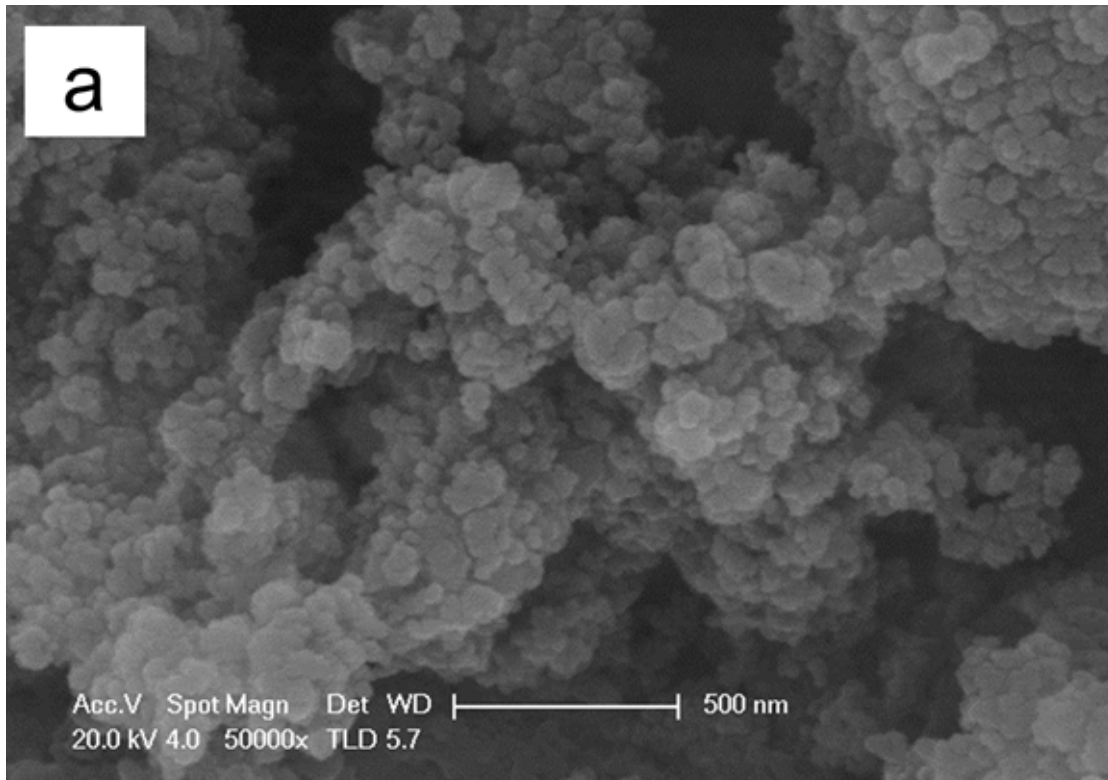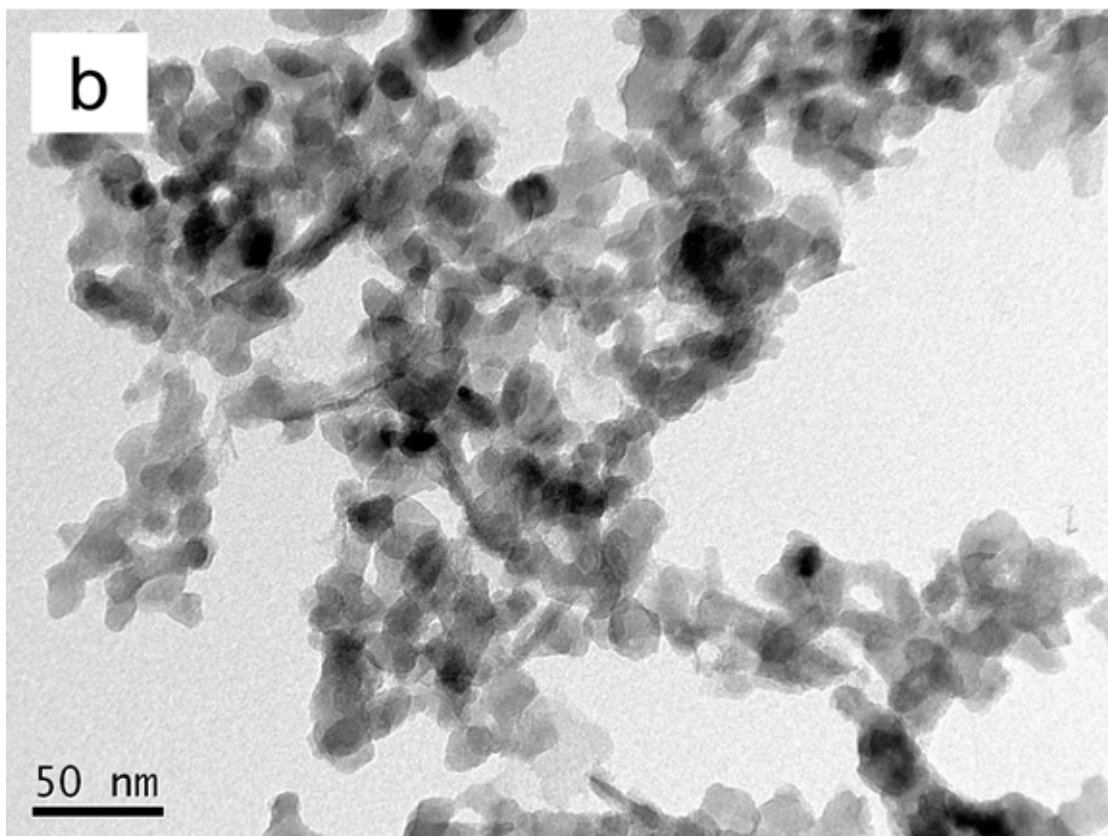

Fig. 1S The SEM (a) and TEM (b) images of the  $\text{Li}_2\text{MnSiO}_4/\text{C}$  composite.

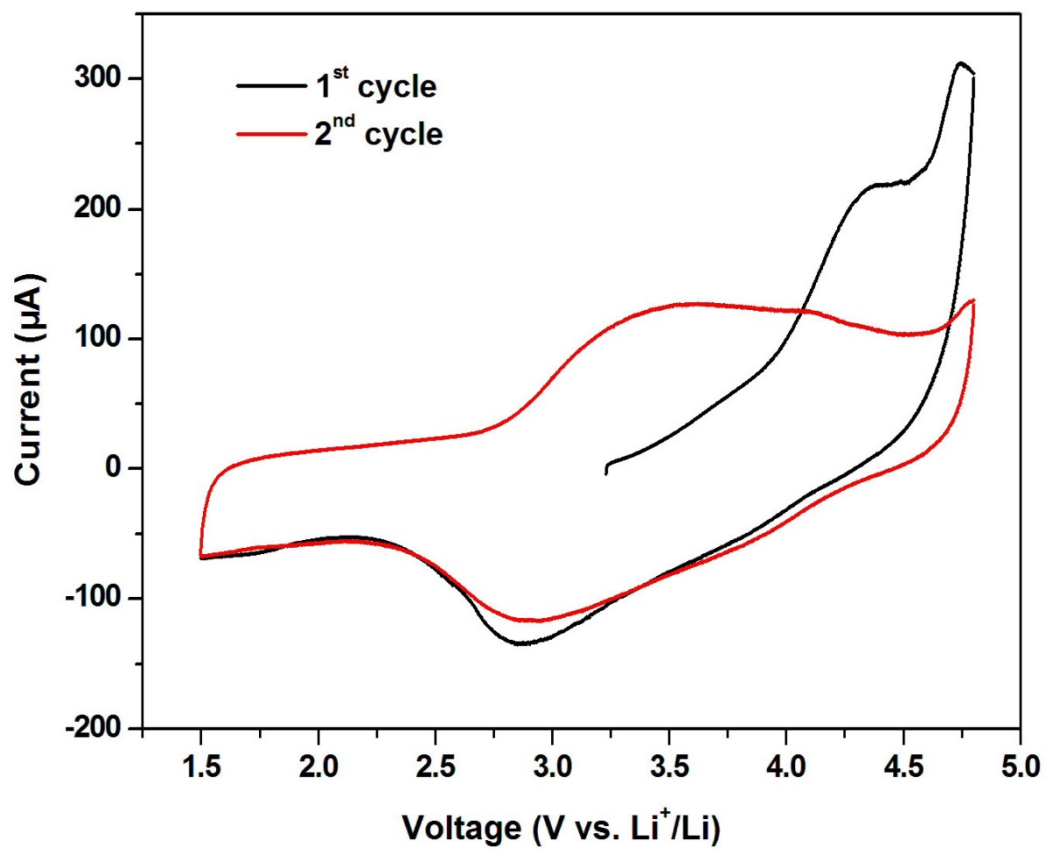

Fig. 2S The cyclic voltammograms (CV) curves of the LMS/C/V<sub>2</sub>O<sub>5</sub> performed at a scan rate of 0.1 mV s<sup>-1</sup> between 1.5 and 4.8 V (vs. Li<sup>+</sup>/Li).

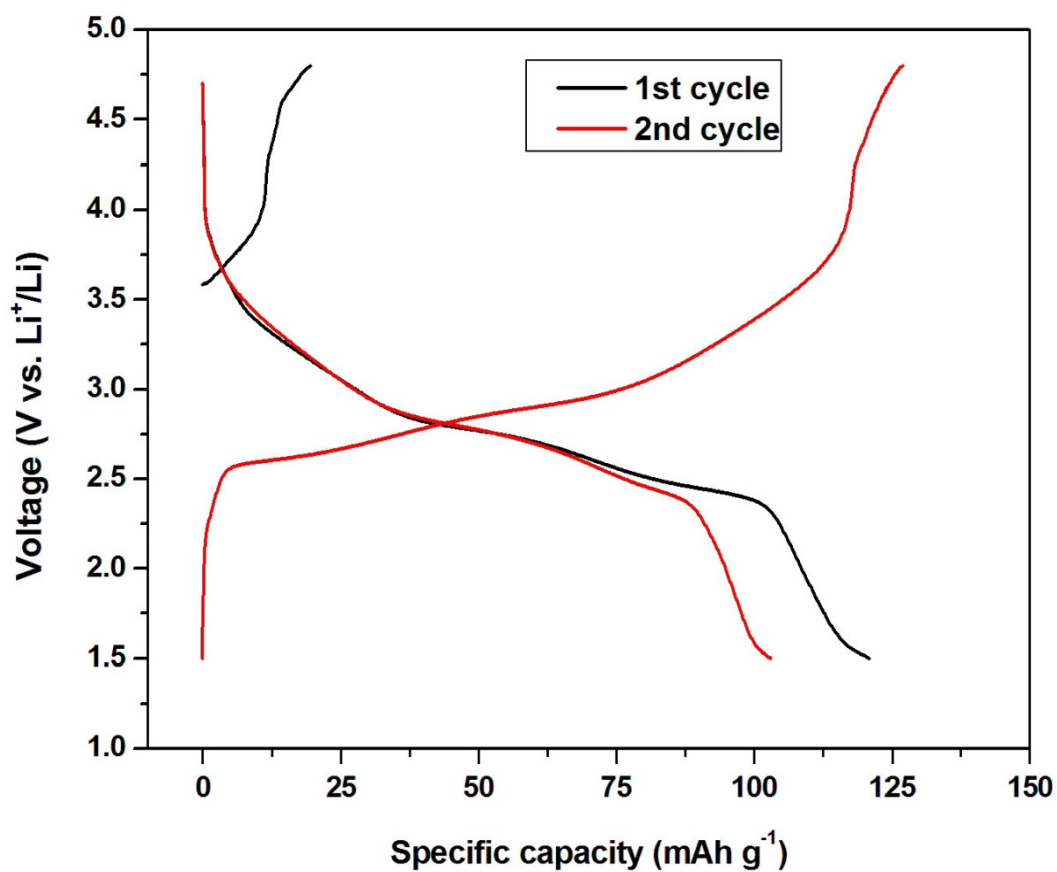

Fig. 3S The charge-discharge profiles of the V<sub>2</sub>O<sub>5</sub> nanowires at a rate of 16 mA g<sup>-1</sup> in a voltage window of 1.5-4.8 V (vs. Li<sup>+</sup>/Li) as cathode materials for lithium ion batteries.
